# Supplementary material for: Preparation of sorbent based on porous monolith incorporated with graphene oxide nanosheets for stir cake sorptive extraction of strongly polar aromatic amines
Source: Royal Society of Chemistry journal article supplement (doi:10.1039/c3ay41860j), 2013-12-09
Supplement: c3ay41860j.pdf [file c3ay41860j.pdf]

Electronic Supplementary Material

**Preparation of sorbent based on porous monolith incorporated with  
graphene oxide nanosheets for stir cake sorptive extraction of  
strongly polar aromatic amines**

Xiaojia Huang\*, Yong Zhang, Dongxing Yuan

*State Key Laboratory of Marine Environmental Science, Key Laboratory of the  
Ministry of Education for Coastal and Wetland Ecosystem, College of the  
Environment and Ecology, Xiamen University, Xiamen 361005, China*

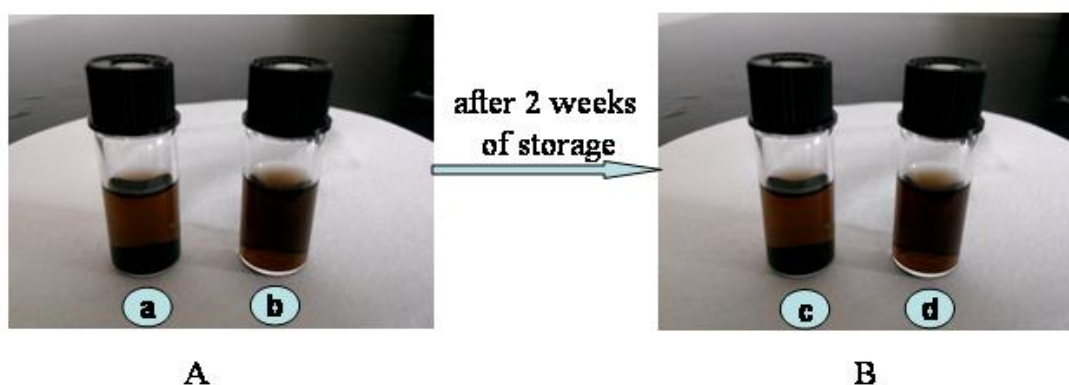

**Fig.S1** Photographs of suspensions (A) new made, (B) after two weeks of storage of GO in water (a and c) and in the mixture of 1-propanol/1,4-butanediol (w/w=1/1) (c and d).

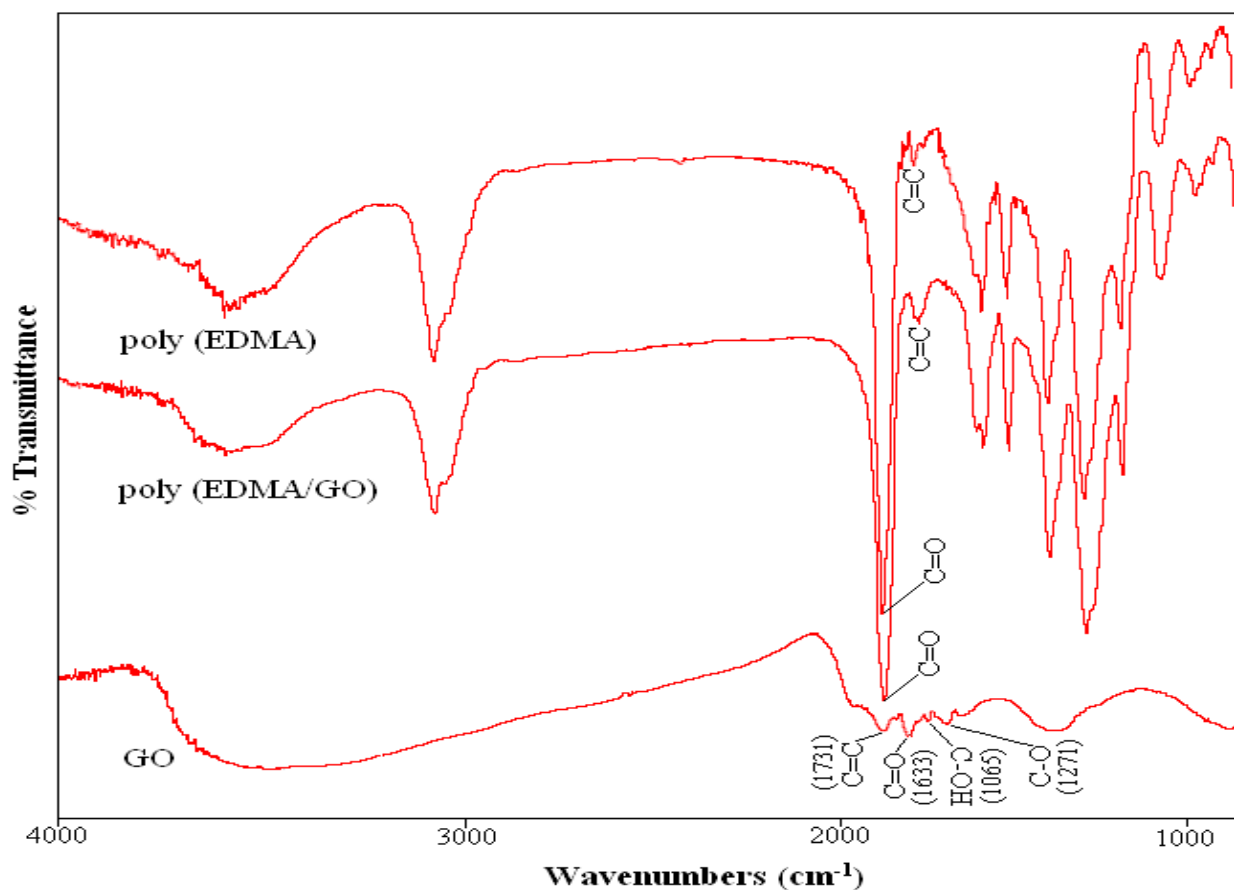

**Fig.S2.** Comparison of FT-IR spectra of the GO, the polymers produced EDMA, and the GO incorporated poly (EDMA) monolith

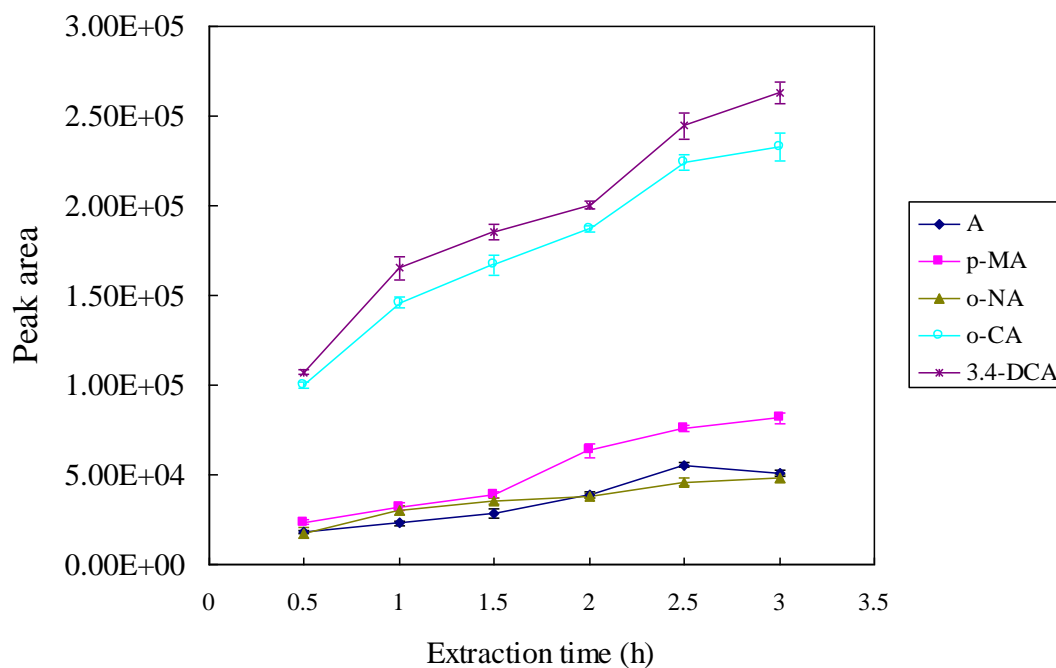

**Fig.S3** The effect of extraction time on extraction efficiency  
Conditions: using method/water (V/V=90/10) binary solution as desorption solvent;

the pH value and salt concentration in sample were 9.0 and 15%, respectively; the desorption time was 1.0 h.

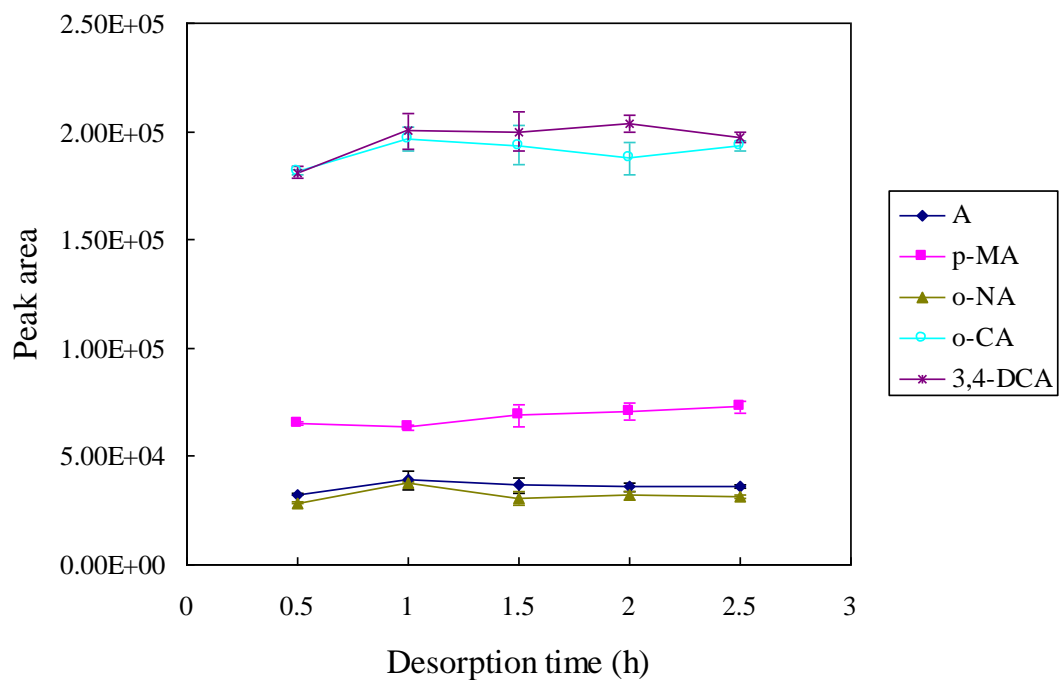

**Fig.S4** The effect of desorption time on extraction efficiency

Conditions: using method/water (V/V=90/10) binary solution as desorption solvent; the pH value and salt concentration in sample were 9.0 and 15%, respectively; the extraction time was 2.0 h.
